# Supplementary material for: Formic acid–methanol complexation vs. esterification: elusive pre-reactive species identified by vibrational spectroscopy
Source: Royal Society of Chemistry journal article supplement (doi:10.1039/d3cp04705a), 2023-01-01
Supplement: d3cp04705a1.pdf [file d3cp04705a1.pdf]

## Supplementary Information for:

# Formic acid – methanol complexation vs esterification: Elusive pre-reactive species identified by vibrational spectroscopy

Sophie M. Schweer, Maxim Gawrilow, Arman Nejad,<sup>‡</sup> and Martin A. Suhm\*

*Institute of Physical Chemistry, University of Goettingen, Tammannstr. 6, 37077 Goettingen, Germany.*

<sup>‡</sup> *Current address: Physical and Theoretical Chemistry Laboratory, University of Oxford, South Parks Road, Oxford OX1 3QZ, UK.*

*E-mail: [msuhm@gwdg.de](mailto:msuhm@gwdg.de)*

## Contents

|                                                                                                   |            |
|---------------------------------------------------------------------------------------------------|------------|
| <b>S1 Auxiliary data for Sec. 3 “Results and discussion”</b>                                      | <b>S2</b>  |
| S1.1 Sec. 3.1 “Computational thermodynamics of ester formation”                                   | S2         |
| S1.1.1 Details on quantum chemical calculations                                                   | S2         |
| S1.1.2 Guinness molecule for C <sub>2</sub> H <sub>6</sub> O <sub>3</sub> sum formula             | S3         |
| S1.2 Sec. 3.2 and 3.3 on “OH stretching signatures of complexes between methanol and formic acid” | S5         |
| S1.2.1 Details on quantum chemical calculations                                                   | S5         |
| S1.2.2 Equilibrium geometries of methanol, formic acid, and their complexes                       | S5         |
| S1.2.3 Vibrational spectroscopic properties                                                       | S6         |
| S1.2.4 Impact of CH deuteration on OH stretching wavenumbers                                      | S8         |
| S1.2.5 Quantification of experimental abundance based on Beer’s law                               | S9         |
| S1.2.6 FTIR jet spectra from 2700 to 3800 cm <sup>-1</sup>                                        | S10        |
| S1.3 Sec. 3.4 “Auxiliary Raman spectra”                                                           | S11        |
| S1.4 Sec. 3.5 “What is different for OD stretching?”                                              | S12        |
| S1.5 Sec. 3.7 “Insights from and benchmarking of anharmonic (VPT2) calculations”                  | S13        |
| S1.6 Sec. 3.9 “Ester detection by solvent vibrations”                                             | S14        |
| <b>S2 Experimental details</b>                                                                    | <b>S16</b> |
| S2.1 Details for the concentration calculations of the IR spectra                                 | S19        |

## S1 Auxiliary data for Sec. 3 “Results and discussion”

### S1.1 Sec. 3.1 “Computational thermodynamics of ester formation”

#### S1.1.1 Details on quantum chemical calculations

Structure optimisation and frequency calculations on DFT level were performed with B3LYP and PBE0 functionals, def2-QZVPP basis set, Grimme’s dispersion correction with Becke-Johnson damping and three-body-terms D3(BJ,abc)(1, 2), integration grid m5, main isotope masses, SCF convergence of  $1 \cdot 10^{-9} E_h$  and a structure convergence of  $1 \cdot 10^{-6} E_h$ . For speedup, resolution of the identity for Coulomb and Exchange integrals RIJK was used(3). Turbomole was employed, using the default values for all remaining parameters(4). Structure optimisation on CCSD(T) level with explicit correlation (F12A) was performed with cc-pVDZ-F12 basis set, density fitting (DF) and frozen core(5, 6) using Molpro(7–9). Except for the SCF convergence ( $1 \cdot 10^{-9} E_h$ ) all parameters were kept at their default values. Single point CCSD(T) energies with explicit correlation (F12\*)(10–12) were calculated with cc-pVTZ-F12 basis set, resolution of identity for Coulomb and Exchange integrals (RIJK)(3), frozen core and SCF convergence  $1 \cdot 10^{-9} E_h$  using Turbomole(4), all other parameters were kept at their default values. In order to find optimal structures of ester-water, methanol-formic acid and  $\text{CO}_2 - \text{H}_2\text{O} - \text{CH}_4$  an automated search using CREST version 2.7.1(13) at GFN2-xTB level(14–16) was performed, followed with a preoptimisation on RIJ-b97-3c/def2-mTZVP level using Turbomole(4). In this part, abbreviations will be used to denote the quantum chemical methods employed (Tab. S1). All calculations were performed without BSSE correction.

**Tab. S1** Abbreviations of quantum chemical methods used in this section.

| Abbreviation      | Description                                                   |
|-------------------|---------------------------------------------------------------|
| B3                | structure optimisation RIJK-B3LYP-D3(BJ,abc)/def2-QZVPP(1–3)  |
| P0                | structure optimisation RIJK-PBE0-D3(BJ,abc)/def2-QZVPP(1–3)   |
| CC <sub>opt</sub> | structure optimisation DF-CCSD(T)-F12A/cc-pVDZ-F12(5, 6)      |
| CC <sub>sp</sub>  | single point energy RIJK-CCSD(F12*)(T*)/cc-pVTZ-F12(3, 10–12) |
| MP2 <sub>sp</sub> | single point energy RIJK-MP2-F12/cc-pVTZ-F12                  |
| ZPE <sub>xy</sub> | zero point energy                                             |

**S1.1.2 Guinness molecule for C<sub>2</sub>H<sub>6</sub>O<sub>3</sub> sum formula**

**Tab. S2** Absolute CCSD(T) energies for structures (see Fig. S1) optimised at different levels of theory and their difference  $\Delta$ . The error for calculating CCSD(T) single point energies on top of B3LYP instead of CCSD(T) optimised structures is at most 0.4 kJ mol<sup>-1</sup>. For MP2<sub>sp</sub>, this error amounts to 0.5 kJ mol<sup>-1</sup>.

|                         | CC <sub>sp</sub> //B3 /E <sub>h</sub> | CC <sub>sp</sub> //CC <sub>opt</sub> /E <sub>h</sub> | $\Delta$ /kJ mol <sup>-1</sup> |
|-------------------------|---------------------------------------|------------------------------------------------------|--------------------------------|
| EW_CO_F                 | -305.207 898                          | -305.208 059                                         | 0.4                            |
| EW_CO_M                 | -305.208 877                          | -305.208 999                                         | 0.3                            |
| MF_bridge               | -305.209 753                          | -305.209 739                                         | <0.1                           |
| MF_open                 | -305.207 110                          | -305.207 109                                         | <0.1                           |
| H <sub>2</sub> O (W)    | -76.371 418                           | -76.371 424                                          | <0.1                           |
| MeOH (M)                | -115.604 521                          | -115.604 520                                         | <0.1                           |
| HCOOH (F)               | -189.587 315                          | -189.587 308                                         | <0.1                           |
| HCOOCH <sub>3</sub> (E) | -228.827 480                          | -228.827 558                                         | 0.2                            |
| CH <sub>4</sub>         | -40.455 201                           | -40.455 201                                          | <0.1                           |
| CO <sub>2</sub>         | -188.409 578                          | -188.409 572                                         | <0.1                           |

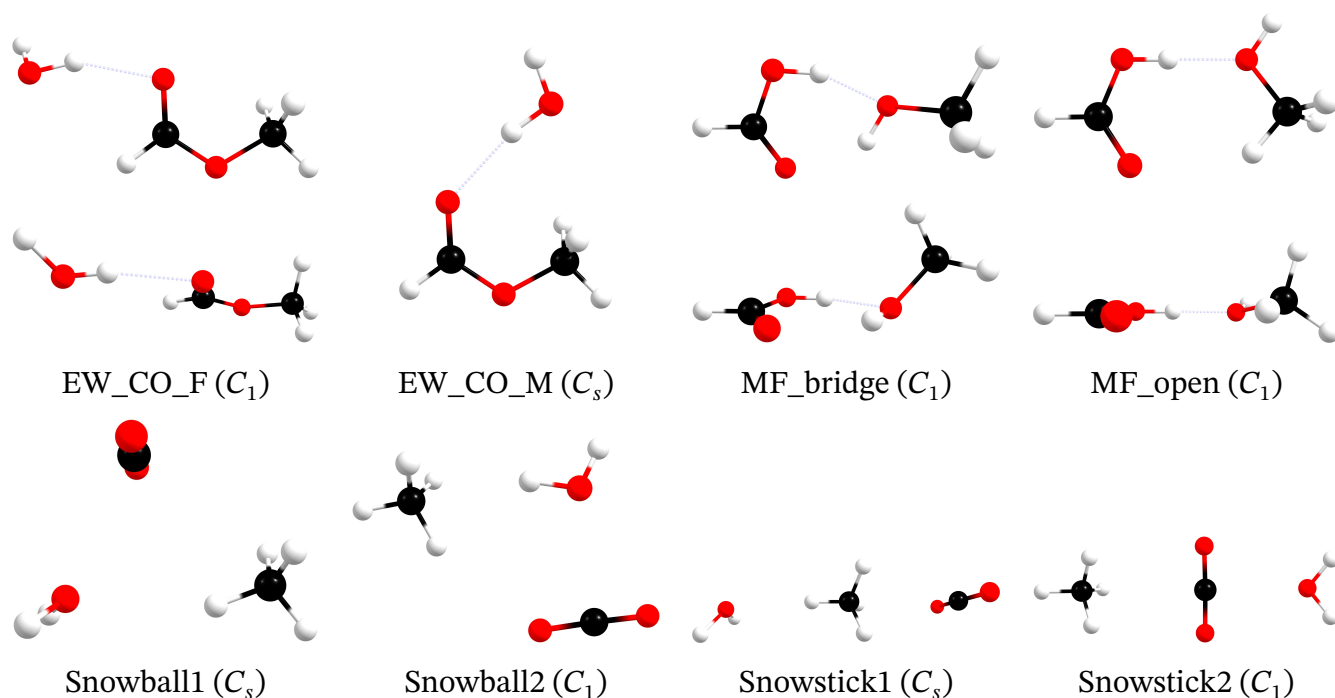

**Fig. S1** Different stable arrangements of the sum formula  $C_2H_6O_3$ . (top row) The two most stable structures for complexes of formate ester with water (EW) and methanol with formic acid (MF). For EW, the water binds to the carbonyl oxygen (CO) and can point either to the formic acid (F) or methyl (M) side. For MF, the OH of methanol can either bind back to the formic acid (bridge) or point away from it (open). (bottom row) Four stable arrangements of  $CO_2$ ,  $H_2O$  and  $CH_4$ , which all are approx.  $100 \text{ kJ mol}^{-1}$  more stable (including ZPE) than any of EW or MF (see Tab. S3).

**Tab. S3** Relative harmonic ZPE-corrected energies at 0 K ( $\Delta E_0$ , in  $\text{kJ mol}^{-1}$ ) and standard Gibbs energies at 298 K ( $\Delta_{298\text{K}}G^\circ$ , in  $\text{kJ mol}^{-1}$ ) of different arrangements for the sum formula  $C_2H_6O_3$  (see Fig. S1). For CC, the non-electronic components (ZPE, enthalpy, entropy) are computed in the harmonic approximation with B3 on the B3 geometry. The ester-water complex is predicted to be more stable than the acid-alcohol one at CCSD(T) level, but both DFT functionals deviate qualitatively from the CCSD(T) result at 0 K. At infinite separation, all methods agree that ester and water are more stable. Although not achievable in our experiment, a hypothetical rearrangement to water, methane and  $CO_2$  would release more than  $100 \text{ kJ mol}^{-1}$ .

|                      | $\Delta E_0$ |       |                       |                                      | $\Delta_{298\text{K}}G^\circ$ |        |                       |                                      |
|----------------------|--------------|-------|-----------------------|--------------------------------------|-------------------------------|--------|-----------------------|--------------------------------------|
|                      | B3           | P0    | CC <sub>sp</sub> //B3 | CC <sub>sp</sub> //CC <sub>opt</sub> | B3                            | P0     | CC <sub>sp</sub> //B3 | CC <sub>sp</sub> //CC <sub>opt</sub> |
| EW_CO_F              | 2.2          | 2.0   | 1.9                   | 1.8                                  | 0.5                           | 0.2    | 0.2                   | 0.1                                  |
| EW_CO_M              | 0            | 0     | 0                     | 0                                    | 0                             | 0      | 0                     | 0                                    |
| MF_bridge            | -2.3         | -4.9  | 2.1                   | 2.5                                  | 0.8                           | -1.7   | 5.2                   | 5.6                                  |
| MF_open              | 2.8          | 1.5   | 7.1                   | 7.4                                  | 3.8                           | 2.2    | 8.1                   | 8.4                                  |
| Snowball1            | -109.3       | -99.2 | -106.0                | —                                    | -129.8                        | -119.2 | -123.9                | —                                    |
| Snowball2            | -109.6       | -99.6 | -106.4                | —                                    | -129.2                        | -119.2 | -123.9                | —                                    |
| Snowstick1           | -108.8       | -98.5 | -105.5                | —                                    | -141.8                        | -133.9 | -138.9                | —                                    |
| Snowstick2           | -101.3       | -91.6 | -97.5                 | —                                    | -136.1                        | -127.1 | -130.9                | —                                    |
| Infinite separation  |              |       |                       |                                      |                               |        |                       |                                      |
| $H_2O + HCOOCH_3$    | 19.2         | 19.2  | 18.4                  | 18.5                                 | -11.2                         | -11.5  | -12.0                 | -11.9                                |
| $MeOH + HCOOH$       | 38.6         | 37.4  | 41.2                  | 41.5                                 | 1.9                           | 0.4    | 4.4                   | 4.8                                  |
| $H_2O + CO_2 + CH_4$ | -98.0        | -87.3 | -94.2                 | -93.9                                | -157.9                        | -147.5 | -154.1                | -153.8                               |

## S1.2 Sec. 3.2 and 3.3 on “OH stretching signatures of complexes between methanol and formic acid”

### S1.2.1 Details on quantum chemical calculations

Structure optimisation and frequency calculations for spectroscopic evaluation on DFT level were performed with the B3LYP functional, def2-QZVP basis set, Grimme’s dispersion correction with Becke-Johnson damping D3(BJ),<sup>(1, 2)</sup> superfine integration grid, main isotope masses, with full optimisation (fopt=superfine). For dissociation energies, the PBE0 functional with D3(BJ) was used, additionally. Gaussian 16 (Rev. A.03) was employed, using the default values for all remaining parameters. The details for the anharmonic vibrational frequency calculations have been given in the main text. For sake of completeness, the keywords are listed below. Before calculating the anharmonic MP2 force fields and dipole derivatives (“freq=anharm”) with Gaussian 16 (Rev. A.03), the geometries were optimised in a separate calculation using strict thresholds (“opt=verytight”). The CCSD(T)-F12a harmonic wavenumbers were calculated with Molpro version 2021.3 (“frequencies”) following a geometry optimisation in Cartesian coordinates (“gthresh, optstep=6.d-5, optgrad=1.d-6, energy=1.d-10, zero=1.d-16”, “optg, gaussian, grms=1.d-5, srms=1.d-5”) using main isotope masses (“mass,iso”) and enabling symmetry wherever available (“symmetry”, “orient”).

### S1.2.2 Equilibrium geometries of methanol, formic acid, and their complexes

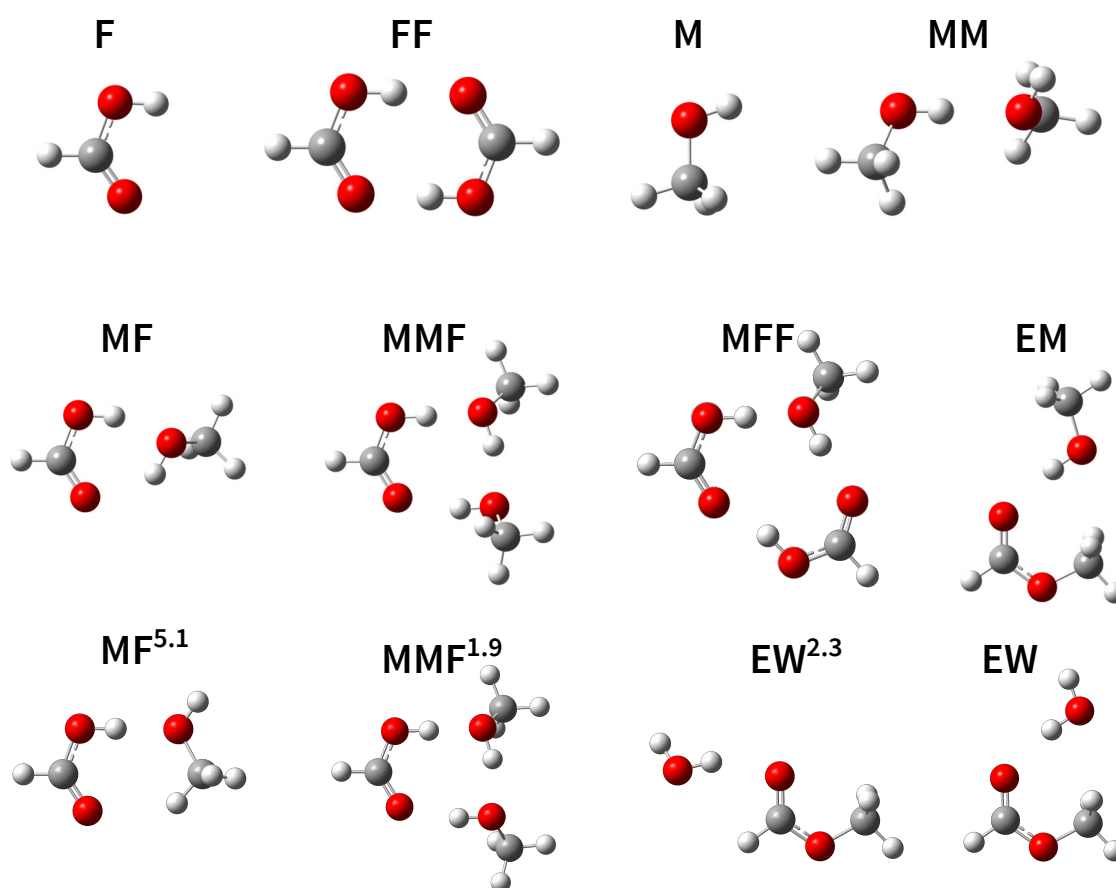

**Fig. S2** Equilibrium geometries and their metastable isomers (up to 9 kJ/mol) of formic acid (F) and methanol (M) and their homodimers and selected mixed dimers and trimers optimised with Gaussian 16 at the B3LYP-D3(BJ)/def2-QZVP level. The methyl formate (E) complexes with methanol as well as water are also included. Vibrational spectroscopic properties and energies are reported in Tab. S4 (harmonic DFT) and S5 (post-HF VPT2).

### S1.2.3 Vibrational spectroscopic properties

**Tab. S4** Spectroscopic properties (harmonic OH stretching wavenumber  $\omega_{\text{OH}}$ , downshift  $-\Delta\omega_{\text{OH}}$  relative to the respective M and F monomer (M/F), infrared band strength  $S_\omega$ , Raman differential cross section  $\sigma_{\text{Raman}}$  corrected for instrument properties and energies, relative conformational energy  $\Delta E_0$  and dissociation energies  $D_{e/0}$  without and with zero point energy correction into the respective monomer structures) for different species optimised at the B3LYP-D3(BJ)/def2-QZVP level. Structures are shown in Figure S2. Some metastable isomers up to 9 kJ/mol are listed with their relative energy in kJ/mol as a superscript.

|                    | $\Delta E_0$         | $\omega_{\text{OH}}$ | $-\Delta\omega_{\text{OH}}$ (M/F) |      | $S_\omega$           | $\sigma_{\text{Raman}}$                           | $D_e$                | $D_0$                |
|--------------------|----------------------|----------------------|-----------------------------------|------|----------------------|---------------------------------------------------|----------------------|----------------------|
|                    | kJ mol <sup>-1</sup> | cm <sup>-1</sup>     | cm <sup>-1</sup>                  |      | km mol <sup>-1</sup> | 10 <sup>-35</sup> m <sup>2</sup> sr <sup>-1</sup> | kJ mol <sup>-1</sup> | kJ mol <sup>-1</sup> |
| F                  | -                    | 3727                 | -                                 | -    | 60                   | 6.6                                               | -                    | -                    |
| FF                 | -                    | 3156                 | -                                 | 571  | 2166                 | 0                                                 | 73.8                 | 66.2                 |
|                    |                      | 3030                 | -                                 | 697  | 0                    | 26.1                                              |                      |                      |
| M                  | -                    | 3840                 | -                                 | -    | 31                   | 6.2                                               | -                    | -                    |
| MM                 | -                    | 3837                 | 3                                 | -    | 42                   | 5.9                                               | 25.7                 | 20.1                 |
|                    |                      | 3669                 | 171                               | -    | 530                  | 14.9                                              |                      |                      |
| MF                 | 0                    | 3656                 | 184                               | 71   | 317                  | 6.1                                               | 49.2                 | 41.2                 |
|                    |                      | 3233                 | 607                               | 494  | 830                  | 16.1                                              |                      |                      |
| MF <sup>5.1</sup>  | 5.1                  | 3848                 | -8                                | -121 | 48                   | 7.3                                               | 42.1                 | 36.1                 |
|                    |                      | 3315                 | 525                               | 412  | 977                  | 16.2                                              |                      |                      |
| MMF                | 0                    | 3538                 | 246                               | 189  | 906                  | 9.2                                               | 106.0                | 91.7                 |
|                    |                      | 3347                 | 493                               | 380  | 1003                 | 13.4                                              |                      |                      |
|                    |                      | 2868                 | 973                               | 859  | 1699                 | 24.1                                              |                      |                      |
| MMF <sup>1.9</sup> | 1.9                  | 3541                 | 299                               | 186  | 902                  | 9.3                                               | 103.9                | 89.8                 |
|                    |                      | 3366                 | 474                               | 361  | 919                  | 12.0                                              |                      |                      |
|                    |                      | 2885                 | 955                               | 842  | 1685                 | 23.7                                              |                      |                      |
| MFF                | 0                    | 3475                 | 366                               | 253  | 1168                 | 10.0                                              | 115.3                | 102.8                |
|                    |                      | 3277                 | 564                               | 450  | 1214                 | 16.7                                              |                      |                      |
|                    |                      | 2793                 | 1048                              | 934  | 1884                 | 22.2                                              |                      |                      |
| EM                 | 0                    | 3710                 | 130                               | -    | 453                  | 13.1                                              | 47.3                 | 40.0                 |
| EW                 | 0                    | 3886                 | -                                 | -    | 94                   | 4.9                                               | 46.8                 | 37.0                 |
|                    |                      | 3695                 | -                                 | -    | 322                  | 12.0                                              |                      |                      |
| EW <sup>2.3</sup>  | 2.3                  | 3886                 | -                                 | -    | 94                   | 4.2                                               | 43.8                 | 34.8                 |
|                    |                      | 3682                 | -                                 | -    | 349                  | 15.0                                              |                      |                      |

**Tab. S5** OH stretching wavenumbers and hydrogen bond-induced downshifts  $-\Delta_{\text{OH}}$  (in  $\text{cm}^{-1}$ ) calculated using the CCSD(T)-F12a/VDZ-F12//MP2/aVTZ hybrid force field. The VPT2 downshifts for the methanol - formic acid complexes are consistently larger than CCSD(T) harmonic shifts by 15-21%, suggesting the potential success of harmonic scaling approaches. Note, however, that the harmonic downshift deviation at CCSD(T) level is usually opposite to that at B3LYP level (Tab. S4), due to the excessive softness of OH bonds in this hybrid functional.

|     |                        | $\nu(\text{OH})$ |                   | $-\Delta_{\text{OH}}(\text{M/F})$ |      |
|-----|------------------------|------------------|-------------------|-----------------------------------|------|
|     |                        | harm             | VPT2              | harm                              | VPT2 |
| F   |                        | 3759             | 3575              |                                   |      |
| M   |                        | 3864             | 3691              |                                   |      |
| MF  | $\text{OH}_{\text{M}}$ | 3709             | 3514              | 155                               | 178  |
|     | $\text{OH}_{\text{F}}$ | 3351             | 3087 <sup>a</sup> | 407                               | 488  |
| MMF | $\text{OH}_{\text{M}}$ | 3636             | 3426              | 228                               | 266  |
|     | $\text{OH}_{\text{M}}$ | 3480             | 3228              | 384                               | 463  |
|     | $\text{OH}_{\text{F}}$ | 3054             | — <sup>b</sup>    | 705                               | —    |
| MFF | $\text{OH}_{\text{M}}$ | 3593             | 3369              | 271                               | 322  |
|     | $\text{OH}_{\text{F}}$ | 3435             | 3182              | 324                               | 393  |
|     | $\text{OH}_{\text{F}}$ | 3004             | — <sup>b</sup>    | 754                               | —    |
| EM  |                        | 3760             | 3592              | 104                               | 100  |

<sup>a</sup> Fermi triad at **3087**, 3133, and 3175 (fundamental bolded).

<sup>b</sup> Heavily perturbed by Fermi resonances.

**Tab. S6** Selected DFT/def2-QZVP and CCSD(T)-F12a/VDZ-F12 dissociation energies (in  $\text{kJ mol}^{-1}$ ) into monomer units with ( $\Delta D_0$ ) and without ( $\Delta D_e$ ) vibrational zero-point correction of some relevant complexes. Comparison to the coupled cluster approach shows the overbinding of the DFT values and the relative insignificance of anharmonic (VPT2) MP2-level corrections.

|     | B3LYP-D3(BJ) |                               | PBE0-D3(BJ)  |                               | CCSD(T)-F12a |                               |                                         |
|-----|--------------|-------------------------------|--------------|-------------------------------|--------------|-------------------------------|-----------------------------------------|
|     | $\Delta D_e$ | $\Delta D_{0,h}$ <sup>a</sup> | $\Delta D_e$ | $\Delta D_{0,h}$ <sup>a</sup> | $\Delta D_e$ | $\Delta D_{0,h}$ <sup>a</sup> | $\Delta D_{0,\text{VPT2}}$ <sup>b</sup> |
| FF  | 73.8         | 66.2                          | 75.9         | 68.9                          | 67.7         | 59.3                          | 59.9                                    |
| MM  | 25.7         | 20.1                          | 25.6         | 20.1                          |              |                               |                                         |
| MF  | 49.2         | 41.2                          | 50.2         | 42.3                          | 46.7         | 38.7                          | 39.1                                    |
| MMF | 106.0        | 91.7                          | 106.9        | 93.1                          | 98.1         | 83.6                          | 84.4                                    |
| MFF | 115.3        | 102.8                         | 116.7        | 104.9                         | 105.8        | 92.6                          | 93.3                                    |
| EM  | 47.2         | 40.0                          | 46.8         | 39.8                          |              |                               |                                         |

<sup>a</sup> Harmonic zero-point correction.

<sup>b</sup> Substituted hybrid force field approach using an MP2/aVTZ-level semi-diagonal quartic force field.

### S1.2.4 Impact of CH deuteration on OH stretching wavenumbers

**Tab. S7** Impact of CH deuteration on the OH stretching fundamentals (in  $\text{cm}^{-1}$ ) of MF, MFF, and MMF at the harmonic B3LYP-D3(BJ)/def2-QZVP and CCSD(T)-F12a/VDZ-F12 level – abbreviated as “DFT” and “CC”, respectively. The latter is augmented by MP2/aVTZ VPT2 corrections for the resonance-free fundamentals (substituted approach). The OH stretching wavenumber of the main isotopologue is reported together with the CH  $\rightarrow$  CD isotope shift. The large isotope shift in MF results from a (predicted) strengthening of the  $\text{OH}_F$  Fermi resonance with the C=O stretching and F-centred OH bending combination level which energetically moves towards  $\text{OH}_F$ .

|     |               | DFT(harm)  |                  | CC(harm)   |                  | CC(VPT2)            |                     |
|-----|---------------|------------|------------------|------------|------------------|---------------------|---------------------|
|     |               | $\omega_e$ | $\Delta\omega_e$ | $\omega_e$ | $\Delta\omega_e$ | $\tilde{\nu}$       | $\Delta\tilde{\nu}$ |
| MF  | $\text{OH}_M$ | 3656.4     | −0.3             | 3709.0     | −0.2             | 3513.6              | 1.5                 |
|     | $\text{OH}_F$ | 3233.4     | −1.8             | 3351.3     | −1.0             | 3087.0 <sup>a</sup> | −38.6 <sup>b</sup>  |
| MMF | $\text{OH}_M$ | 3537.8     | −0.7             | 3636.5     | −0.5             | 3425.9              | −0.4                |
|     | $\text{OH}_M$ | 3347.2     | −1.5             | 3480.4     | −0.8             | 3228.5              | −2.0                |
|     | $\text{OH}_F$ | 2867.8     | 3.8              | 3054.0     | 4.4              | —                   | —                   |
| MFF | $\text{OH}_M$ | 3474.7     | −0.9             | 3593.5     | −0.6             | 3369.3              | 0.5                 |
|     | $\text{OH}_F$ | 3276.8     | −1.5             | 3435.0     | −0.7             | 3182.4              | −2.8                |
|     | $\text{OH}_F$ | 2792.8     | 2.7              | 3004.4     | 9.5              | —                   | —                   |

<sup>a</sup> (CH) Fermi triad at **3087**, 3133, and 3175 (fundamental bolded,  $\nu_{\text{C=O}} + \delta_{\text{OH}}$  italicised).

<sup>b</sup> (CD) Fermi triad at **3048**, 3102, and 3145 (fundamental bolded,  $\nu_{\text{C=O}} + \delta_{\text{OH}}$  italicised); third state differs from *a*.



### S1.2.5 Quantification of experimental abundance based on Beer's law

$$(S1) \quad \frac{c}{\text{cm}^3} = C \cdot \frac{\int Ad\tilde{\nu}}{\text{cm}^{-1}} \cdot \left[ \frac{S_\omega}{\text{km mol}^{-1}} \right]^{-1}$$

- $c$  : estimated particle concentration of the compound
- $C = N_A \text{ mol cm} / (10^5 d) \approx 10^{17}$  (for a slit jet with  $d = 60$  cm)
- $\int Ad\tilde{\nu}$  : area of the band of the investigated compound in the natural absorbance spectrum  $A = \ln(I_0/I) \approx 2.3 \lg(I_0/I)$
- $S_\omega$  : predicted infrared band strength, here employing the double-harmonic approximation

**Tab. S8** Quantification of average abundance based on integration of the absorbance signals with a numerical integration with a straight line via OriginLab<sup>17</sup>. For the chosen spectra, the corresponding figure number and trace are listed. For every monomer and cluster, the determined area  $\lg(I_0/I)$  is listed with the  $\tilde{\nu}_{\text{upper}}$  and  $\tilde{\nu}_{\text{lower}}$  integration limit. The integral for F could not be determined for every spectrum because of its overlap with the MM band. The used infrared band strengths can be found in Tab. S4. Eq. S1 was used to estimate the abundance.

| Figure | Structure | $\lg(I_0/I) / 10^{-3} \text{ cm}^{-1}$ | $\tilde{\nu}_{\text{upper}} - \tilde{\nu}_{\text{lower}} / \text{cm}^{-1}$ | amount / $\text{cm}^{-3}$ |
|--------|-----------|----------------------------------------|----------------------------------------------------------------------------|---------------------------|
| 2c+3c  | M         | 2.7                                    | 3706–3671                                                                  | $2.0 \times 10^{13}$      |
|        | F         | -                                      | -                                                                          | -                         |
|        | MF        | 0.60                                   | 3533–3511                                                                  | $4.3 \times 10^{11}$      |
|        | MMF       | 0.69                                   | 3442–3422                                                                  | $1.8 \times 10^{11}$      |
|        | MFF       | 1.16                                   | 3386–3368                                                                  | $2.3 \times 10^{11}$      |
| 9c     | M         | 1.53                                   | 3706–3671                                                                  | $1.2 \times 10^{13}$      |
|        | F         | 2.19                                   | 3589–3551                                                                  | $8.4 \times 10^{12}$      |
|        | MF        | 0.37                                   | 3533–3511                                                                  | $2.7 \times 10^{11}$      |
|        | MMF       | 0.23                                   | 3442–3422                                                                  | $5.9 \times 10^{10}$      |
|        | MFF       | 0.47                                   | 3386–3368                                                                  | $9.2 \times 10^{10}$      |
|        | EM        | 0.10                                   | 3597–3588                                                                  | $5.2 \times 10^{10}$      |
| 9d     | M         | 1.53                                   | 3706–3671                                                                  | $1.2 \times 10^{13}$      |
|        | F         | 1.76                                   | 3589–3551                                                                  | $6.7 \times 10^{12}$      |
|        | MF        | 0.29                                   | 3533–3511                                                                  | $2.1 \times 10^{11}$      |
|        | MMF       | 0.13                                   | 3442–3422                                                                  | $3.3 \times 10^{10}$      |
|        | MFF       | 0.29                                   | 3386–3368                                                                  | $5.7 \times 10^{10}$      |
|        | EM        | 0.08                                   | 3597–3588                                                                  | $3.8 \times 10^{10}$      |
| S3c    | M         | 1.04                                   | 3706–3671                                                                  | $7.8 \times 10^{12}$      |
|        | F         | 4.15                                   | 3589–3551                                                                  | $1.6 \times 10^{13}$      |
|        | MF        | 0.55                                   | 3533–3511                                                                  | $4.0 \times 10^{11}$      |
|        | MMF       | 0.39                                   | 3442–3422                                                                  | $1.0 \times 10^{11}$      |
|        | MFF       | 2.27                                   | 3386–3368                                                                  | $4.5 \times 10^{11}$      |

S1.2.6 FTIR jet spectra from 2700 to 3800  $\text{cm}^{-1}$ 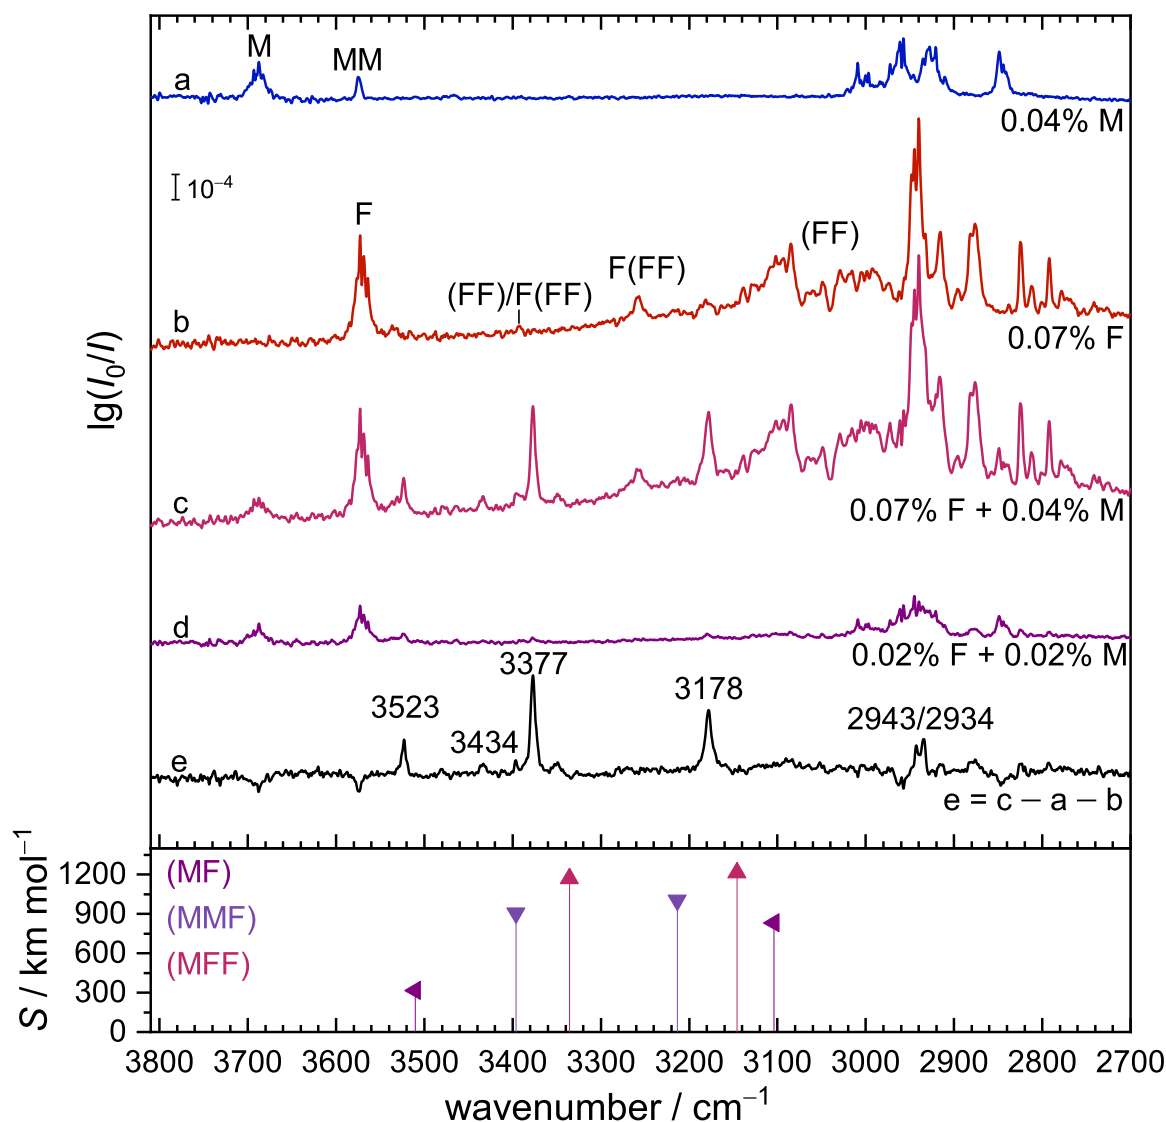

**Fig. S3** *Filet* jet FTIR spectra of methanol in helium (a, 358 scans), formic acid in helium (b, 100 scans) and mixtures of both in helium with different concentrations of formic acid (c+d, 300/350 scans, d see also Figs. 2+3, high dilution), all at a stagnation pressure of 750 mbar. Trace e (see also Fig. 2f and 3f in the main text) shows the difference spectrum of trace c obtained by subtracting the unscaled single substance spectra from that of the mixture. The harmonically calculated (B3LYP-D3(BJ)/def2-QZVP), scaled ( $\times 0.96$ ) band positions of the OH stretching vibrations of the global minimum structure of the mixed dimer (MF) and trimers (MMF) and (MFF) are shown below the experimental spectra.

## S1.3 Sec. 3.4 “Auxiliary Raman spectra”

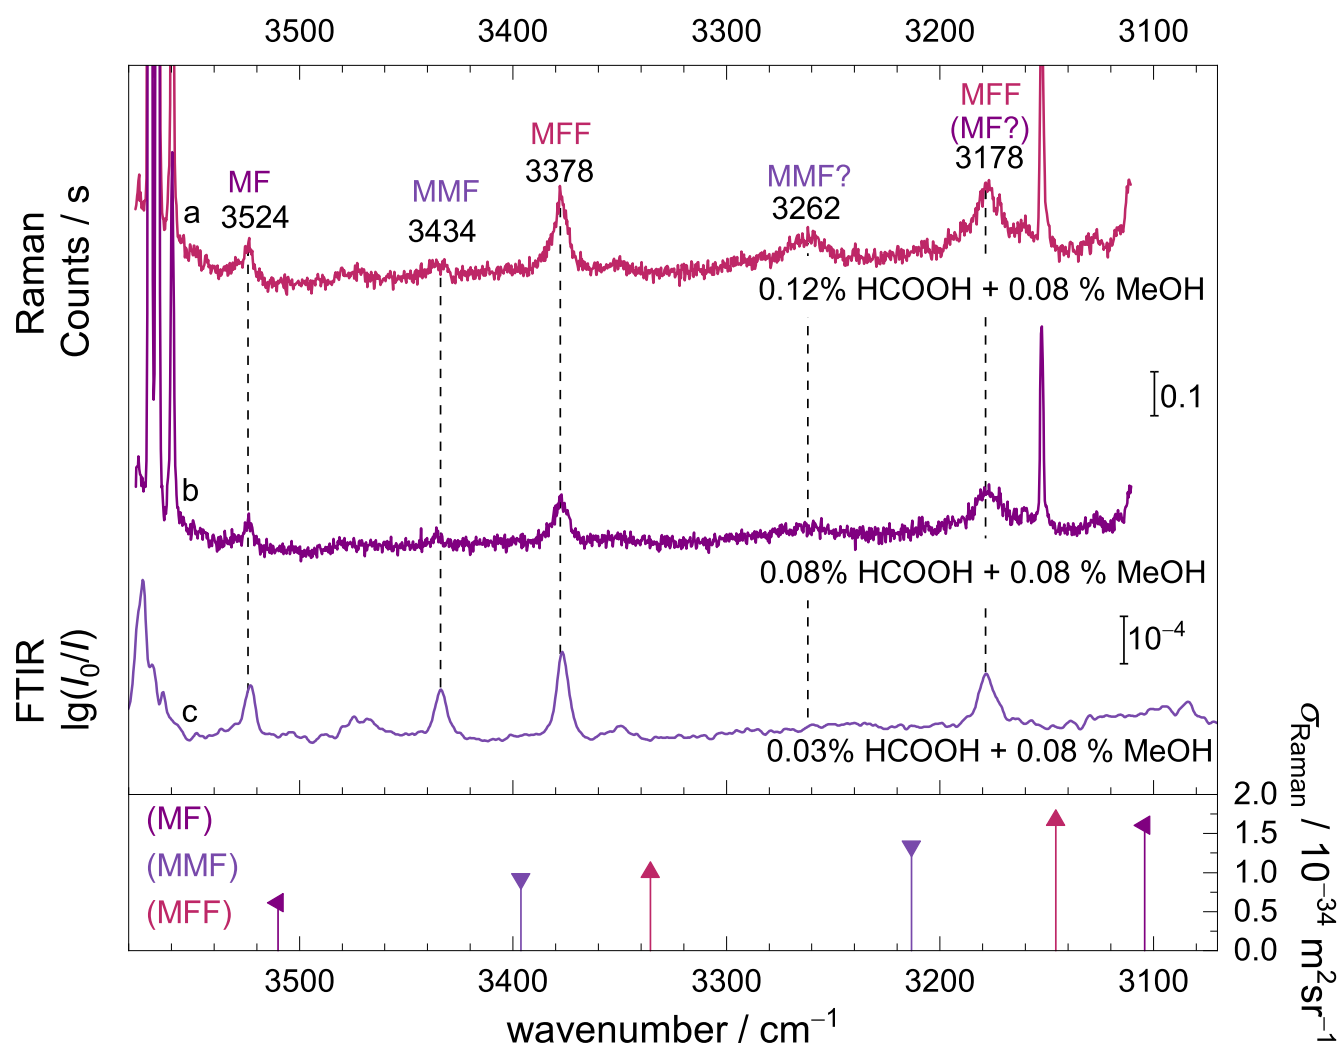

**Fig. S4** OH stretching Raman (a, b) and FTIR (c, see also Figs. 2c+3c) spectra of the methanol and formic acid mixture expanded in helium with different concentrations. Each Raman spectrum is averaged over 6 data collections of 300 s duration. The band positions of the mixed clusters are included. The harmonically calculated (B3LYP-D3(BJ)/def2-QZVP), scaled (0.96) band positions of the OH stretching vibrations of the global minimum structure of the mixed dimer (MF), and trimers (MMF) and (MFF) are shown below the experimental spectra.

## S1.4 Sec. 3.5 “What is different for OD stretching?”

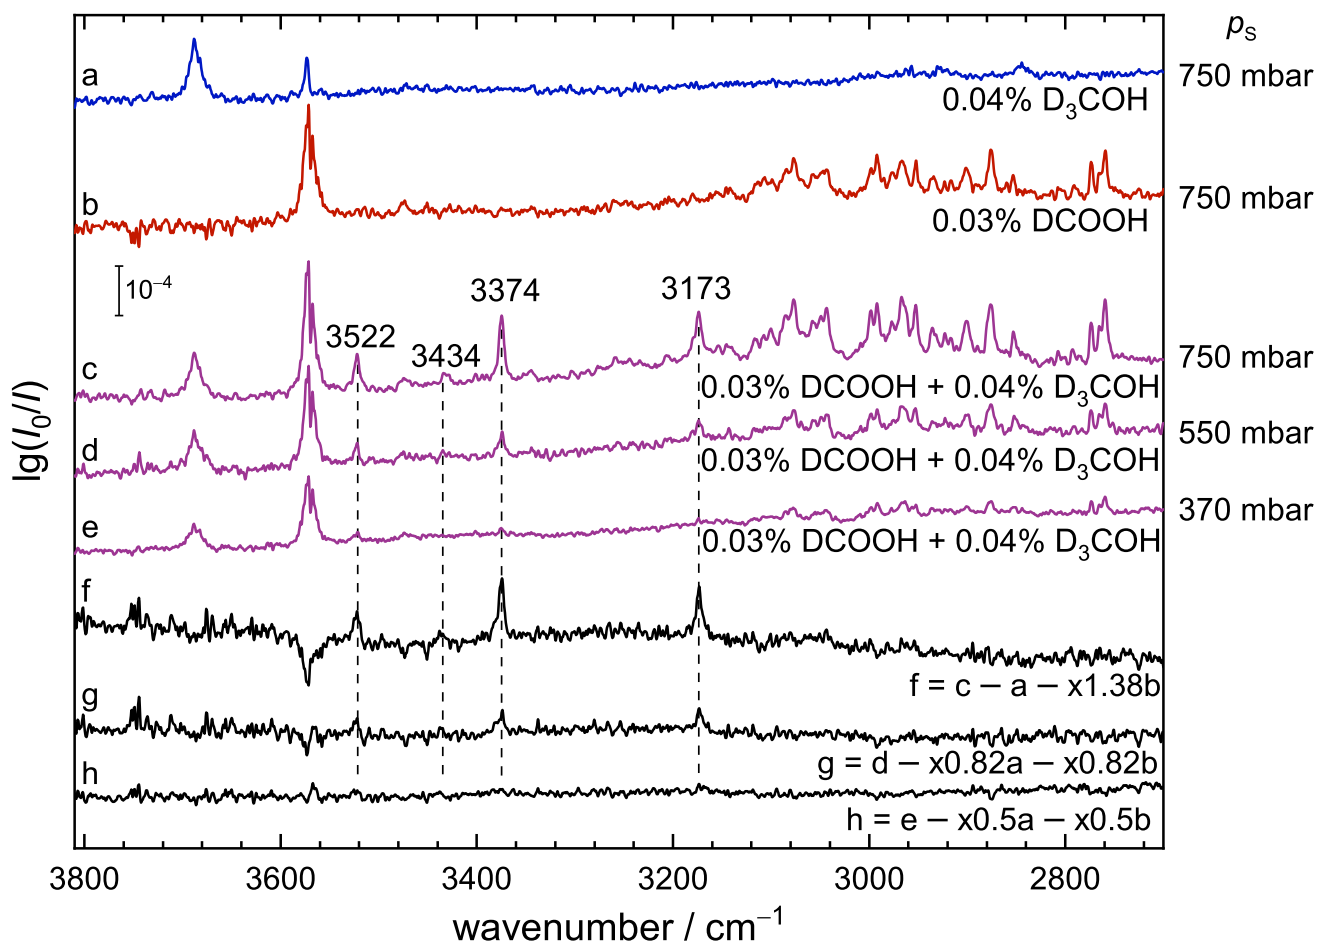

**Fig. S5** *Filet jet* FTIR spectra of  $\text{CD}_3\text{OH}$  in helium (a, 200 scans),  $\text{DCOOH}$  in helium (b, 90 scans) and a mixture of both in helium at different stagnation pressures (c-e, 300/100/300 scans). Traces f-h show difference spectra of the mixtures corrected by scaled single substance spectra (for trace f see also the grey trace in Fig. 3). The scaling factors are displayed in the figure.

## S1.5 Sec. 3.7 “Insights from and benchmarking of anharmonic (VPT2) calculations”

**Tab. S9** Raw data (in  $\text{cm}^{-1}$ ) visualised in Fig. 7 of the main text (calc – exp). “A” corresponds to scaled ( $\times 0.96$ ) harmonic B3LYP-D3(BJ)/def2-QZVP wavenumbers whereas “B” and “C” are VPT2 wavenumbers from hybrid CCSD(T)-F12a/VDZ-F12//MP2/aVXZ force fields (B: X=D; C: X=T).

|     | Experiment        | Calculation |                   |                   |
|-----|-------------------|-------------|-------------------|-------------------|
|     | IR                | A           | B                 | C                 |
| M   | 3685              | 3687        | 3673              | 3691              |
| F   | 3570              | 3578        | 3563              | 3575              |
| W   | 3756              | 3755        | 3753              | 3764              |
|     | 3657              | 3657        | 3655              | 3668              |
| MF  | 3523              | 3510        | 3506              | 3514              |
|     | 3178 <sup>a</sup> | 3104        | 3085 <sup>b</sup> | 3087 <sup>c</sup> |
| EM  | 3591              | 3562        | 3582              | 3592              |
| EW  |                   | 3731        | 3701 <sup>d</sup> | 3743 <sup>e</sup> |
|     | 3587              | 3547        | 3574              | 3591              |
| MMF | 3434              | 3396        | 3420              | 3426              |
|     | 3262 <sup>a</sup> | 3213        | 3217              | 3228              |
|     |                   | 2753        |                   |                   |
| MFF | 3377              | 3336        | 3365              | 3369              |
|     | 3178              | 3146        | 3192              | 3182              |
|     |                   | 2681        |                   |                   |

<sup>a</sup> Hypothetical (MF) or tentative (MMF) experimental assignment (see main text for details).

<sup>b</sup> Fermi triad at **3085**, 3152, and 3193 (fundamental bolded).

<sup>c</sup> Different Fermi triad at **3087**, 3133, and 3175 (fundamental bolded).

<sup>d</sup> Fermi dyad at **3701** and 3719 (fundamental bolded).

<sup>e</sup> Fermi dyad at 3730 and **3743** (fundamental bolded).

## S1.6 Sec. 3.9 “Ester detection by solvent vibrations”

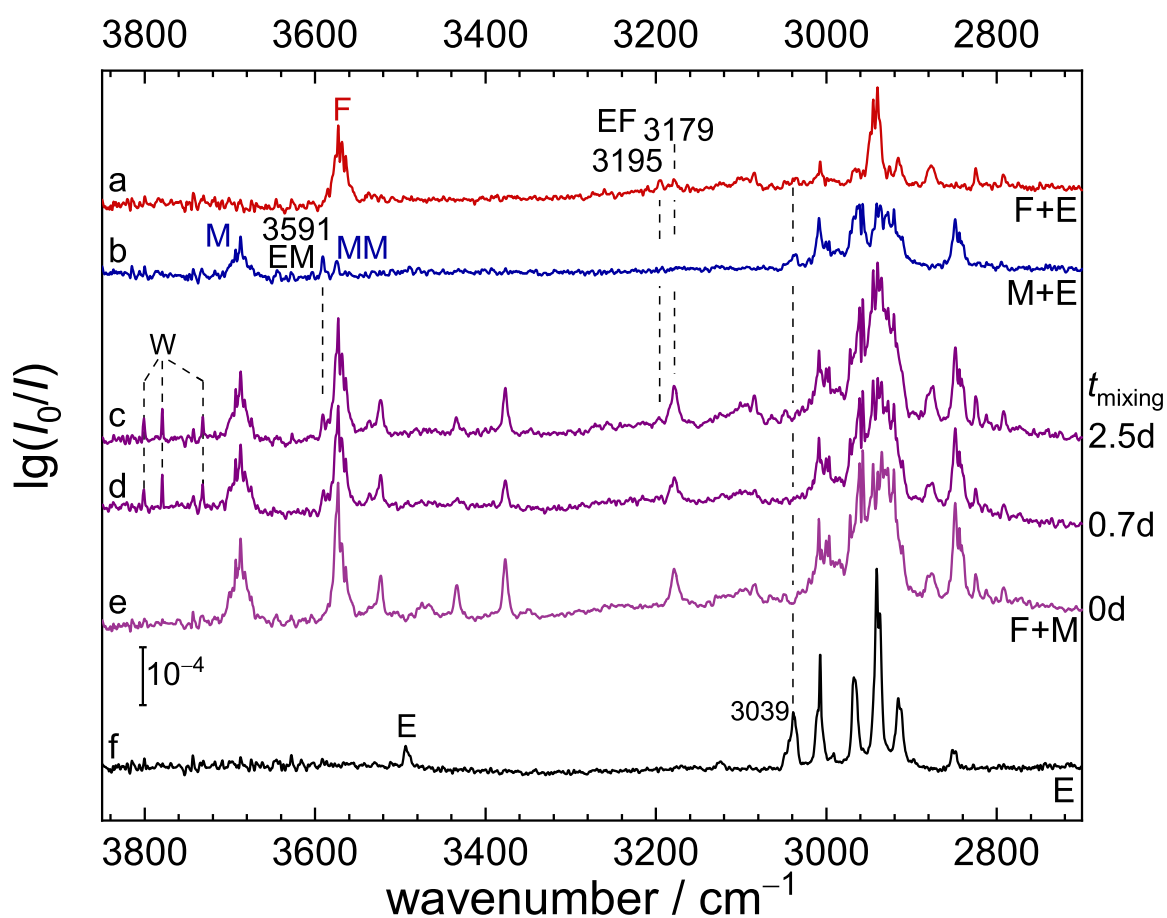

**Fig. S6** Spectra of the premixed methanol and formic acid. Comparison of online mixing (trace e) with higher mixing times  $t_{\text{mixing}}$  of 0.7 and 2.5 days (trace d+c). In the main text the spectra are cut off at  $3000 \text{ cm}^{-1}$ . Note that the spectra c and d were obtained from two independent, nominally equal gas mixtures. Spectral variations can be due to variations in original mixing composition or due to the different storage time in the mixing bottle

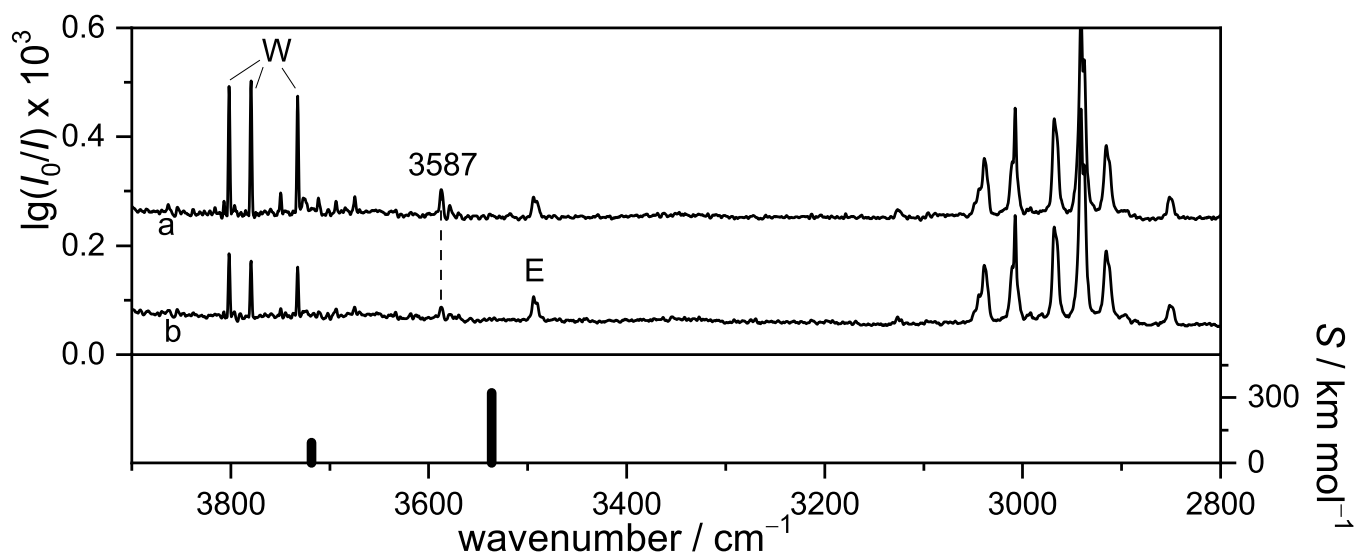

**Fig. S7** FTIR spectra measured with the *gratin* jet (see Reference (18) for experimental details) of 0.04 % methyl formate (E) in helium at 750 mbar with increasing water concentrations (W) from b to a (each 400 scans). The scaled ( $\times 0.96$ ) OH vibrations of EW at B3LYP-D3(BJ)/def2-QZVP level are shown at the bottom.

## S2 Experimental details

**Tab. S10** List of the purity and supplier of the used chemicals.

| Chemical           | Purity                 | Deuteration | Manufacturer    |
|--------------------|------------------------|-------------|-----------------|
| Methanol (M)       | >99 %                  | -           | abcr            |
|                    | >99.99 %               | -           | Fischer science |
| Methanol (M)       | 99.9 % (99.8 % D-atom) | CD          | euriso-top      |
| Methanol (M)       | (99.5 % D-atom)        | OD          | Merck           |
| Formic acid (F)    | 98 %                   | -           | Acros organics  |
|                    | 98 %                   | -           | J&K             |
| Formic acid (F)    | 95 % (98 % D-atom)     | CD          | abcr            |
| Formic acid (F)    | 95 % (98 % D-atom)     | OD          | abcr            |
| Methyl formate (E) | >99 %                  | -           | Fluka           |
| Water (W)          |                        | -           | house water     |
| Helium             | $\geq 99.996$ %        |             | Nippon Gas      |
|                    | $\geq 99.996$ %        |             | Linde           |



**Tab. S11** Experimental details for the shown Raman jet spectra. Each spectrum was recorded with 2.0 bar helium pressure at the saturators, 0.7 bar reservoir pressure and the feeding lines at room temperature but with different nozzle temperatures ( $\theta_n$ ). The laser beam (532.274 nm) with the laser power  $P_L$  crossed the expansion with a distance of 1 mm to the nozzle. The monochromator was set at 647.2 nm and every spectrum is averaged over  $N_{\text{Scan}}$  scans with an exposure time of  $t_e$ . The saturator temperatures for formic acid (F,  $\theta_F$ ) and methanol (M,  $\theta_T$ ) are listed. For the generation of the gas mixture, gas flow meters were used (online mixing O). 'F (in He) : M (in He) : He' shows the individual flow meter settings for internal reference. For calibration and conversion to wavenumbers, atomic transitions of a neon discharge lamp were used. The date the spectra were recorded as well as the despiking method ( $M_{\text{des}}$ ) and the filename are listed for internal reference. All mixtures listed here were online mixed (see main text).

| Figure,<br>Trace | $\theta_F$<br>°C | $\theta_M$<br>°C | F (in He) : M (in He) : He | $\theta_n$<br>°C | $t_e$<br>s | $N_{\text{Scan}}$ | $P_L$<br>W | $M_{\text{des}}$ | Date<br>YY:MM:DD | Filename                            |
|------------------|------------------|------------------|----------------------------|------------------|------------|-------------------|------------|------------------|------------------|-------------------------------------|
| 4a               | 10               | -20              | 20 : 100 : 90              | rt               | 600        | 3                 | 20         | led              | 21:04:19         | 20210419_g_FA_[...]_led_avg_cal.dat |
| 4b               | 10               | -20              | 10 : 100 : 100             | rt               | 600        | 4                 | 20         | led              | 21:04:19         | 20210419_f_FA_[...]_led_avg_cal.dat |
| 4c               | 10               | -20              | 10 : 200 : 100             | rt               | 600        | 3                 | 20         | led              | 21:04:19         | 20210419_h_FA_[...]_led_avg_cal.dat |
| 4d <sup>a</sup>  | 10               | -20              | 10 : 100 : 100             | rt               | 600        | 4                 | 20         | led              | 21:04:19         | 20210419_f_FA_[...]_led_avg_cal.dat |
|                  | 10               | -20              | 10 : 100 : 100             | 30               | 600        | 4                 | 20         | led              | 21:04:22         | 20210422_a_FA_[...]_led_avg_cal.dat |
| 4e               | 10               | -20              | 10 : 100 : 100             | 50               | 600        | 3                 | 20         | des              | 21:04:19         | 20210422_b_FA_[...]_des_avg_cal.dat |
| 4f <sup>a</sup>  | 10               | -20              | 10 : 100 : 100             | 75               | 600        | 5                 | 20         | des              | 21:04:22         | 20210422_c_FA_[...]_des_avg_cal.dat |
|                  | 10               | -20              | 10 : 100 : 100             | 100              | 600        | 3                 | 20         | des              | 21:04:22         | 20210422_d_FA_[...]_des_avg_cal.dat |
| S4a              | 10               | <sup>b</sup>     | 9 : 30 <sup>c</sup> : 100  | rt               | 300        | 6                 | 25         | des              | 20:01:21         | 200121_b_FA_[...]_des_cal.dat       |
| S4b              | 10               | <sup>b</sup>     | 6 : 30 <sup>c</sup> : 100  | rt               | 300        | 6                 | 25         | des              | 20:01:21         | 200121_a_FA_[...]_des_cal.dat       |

<sup>a</sup> The shown spectrum was averaged over these two spectra, <sup>b</sup> instead of the saturator a mixing bottle was used with 100 mbar in 50 bar helium (0.2 %), <sup>c</sup> a larger flow meter was used.

**Tab. S12** Each IR spectrum was recorded with an aperture of 3.5 mm, an InSb/MCT sandwich detector, a spectral bandpass filter transparent between 2500 and 4100  $\text{cm}^{-1}$  (internal reference: F13a),  $\text{CaF}_2$  optics and a resolution of 2  $\text{cm}^{-1}$ . The helium pressure in the gas pipes was at 1.6 bar and the reservoir pressure at 750 mbar. For each measurement, a mixed-gas bottle with defined concentrations was prepared, e.g. for 2c, 20 mbar formic acid (F) was prepared with 50 bar helium ( $p_{\text{He, mix}}$ ) and mixed together 1:1 with a bottle of 40 mbar methanol (M) prepared in 25 bar helium ( $p_{\text{He, mix}}$ ) which leads to a concentration (mole fraction) of 0.03 % F and 0.08 % M. 'F : M (: E)' shows the individual conditions while  $c(\text{X})$  stands for the actual concentration (or mole fraction  $x$ ) in the spectra, E stands for the ester methyl formate. The corresponding mixing methods online (O) or pre-mixing (P) are also listed under "Mixing". The spectra were averaged over multiple scans, with  $N_{\text{Scan}}$  as the amount of averaged scans. The date the spectra were recorded as well as the filename are listed for internal reference.

| Figure,<br>Trace                  | F : M (: E)<br>mbar | $p_{\text{He, mix}}$<br>bar | $c(\text{F}) : c(\text{M}) (:c(\text{E}))$<br>% | Mixing | $N_{\text{Scan}}$ | Date<br>YY:MM:DD | Filename                                  |
|-----------------------------------|---------------------|-----------------------------|-------------------------------------------------|--------|-------------------|------------------|-------------------------------------------|
| 2a+3a                             | 10 : –              | 50                          | 0.03 : –                                        | O      | 375               | 19:08:19         | 190829-a-FA-[...].375.dpt                 |
| 2b+3b                             | – : 40              | 50                          | – : 0.08                                        | O      | 350               | 16:04:29         | 160429-a-MeOH_[...].350.dpt               |
| 2+3 h.d.+S3d                      | 10 : 20             | 50 : 50                     | 0.02 : 0.02                                     | O      | 350               | 19:10:28         | 191028-f-FA-[...].350.dpt                 |
| 2c+3c+5a                          | 20 : 40             | 50 : 25                     | 0.03 : 0.08                                     | O      | 300               | 19:11:19         | 191119-b-MeOH-[...].300.dpt               |
| 2f+3f                             |                     |                             |                                                 |        | see S3e           |                  |                                           |
| 3 C-D                             |                     |                             |                                                 |        | see S5f           |                  |                                           |
| 5b <sup>a</sup>                   | 10 : 40             | 25 : 25                     | 0.03 : 0.08                                     | O      | 350               | 23:07:05         | 20230705-a-d-MeOD-[...].350.dpt           |
| 9a+S6a                            | 10 : – (: 10)       | 50 : 50                     | 0.03 : – (: 0.02)                               | O      | 300               | 19:10:28         | 191028-g-FA-[...].300.dpt                 |
| 9b+S6b                            | – : 20 (: 10)       | 50 : 50                     | – : 0.04 (: 0.02)                               | O      | 350               | 19:11:04         | 191104-a-MeOH-[...].350.dpt               |
| 9c+S6c                            | 10 : 20             | 50                          | 0.02 : 0.04                                     | P      | 350               | 19:12:09         | 191209-a-MeOH-[...].350.dpt               |
| 9d+S6d                            | 10 : 20             | 50                          | 0.02 : 0.04                                     | P      | 365               | 19:10:17         | 191017-a-FA-[...].365.dpt                 |
| 9e <sup>b</sup> +S6e <sup>b</sup> | 10 : 20             | 50 : 50                     | 0.02 : 0.02                                     | O      | 350               | 19:10:28         | 191028-f-FA-[...].350.dpt                 |
|                                   | 20 : 40             | 50 : 25                     | 0.02 : 0.08                                     | O      | 300               | 19:11:19         | 191119-b-MeOH-[...].300.dpt               |
| 9f+S6f                            | – : – (: 20)        | 50                          | – : – : 0.04                                    | O      | 405               | 19:11:06         | 191106-a-MF-[...].405.dpt                 |
| S3a                               | – : 20              | 50                          | – : 0.04                                        | O      | 358               | 19:10:22         | 191022-a-MeOH-[...].358.dpt               |
| S3b                               | 38.2 : –            | 50                          | 0.07 : – (He)                                   | O      | 100               | 20:01:30         | 200130-m+n-FA-[...].100.dpt               |
| S3c                               | 38.2 : 40           | 50 : 50                     | 0.07 : 0.04                                     | O      | 300               | 20:01:30         | 200130-a-f-FA-[...].300.dpt               |
| S5a                               | – : 40              | 50                          | – (He) : 0.04                                   | O      | 200               | 20:02:12         | 200212-n-dMeOH-[...].200.dpt              |
| S5b                               | 20 : –              | 50                          | 0.03 : – (He)                                   | O      | 90                | 20:02:12         | 200212-m-FdA-[...].90.dpt                 |
| S5c <sup>c</sup>                  | 20 : 40             | 50:50                       | 0.03 : 0.04                                     | O      | 300               | 20:02:12         | 200212-b-e-FdA-[...].300.dpt              |
| S5d <sup>d</sup>                  | 20 : 40             | 50:50                       | 0.03 : 0.04                                     | O      | 300               | 20:02:12         | 200212-b-e-FdA-[...].300.dpt              |
| S5e                               | 20 : 40             | 50:50                       | 0.03 : 0.04                                     | O      | 300               | 20:02:12         | 200212-b-e-FdA-[...].300.dpt              |
| S7a <sup>e</sup>                  |                     |                             | – : – (: 0.04)                                  |        | 400               | 19:11:25         | 20191125-defg-Methylformiat-[...].400.dpt |
| S7b <sup>e</sup>                  |                     |                             | – : – (: 0.04)                                  |        | 400               | 19:11:20         | 20191120-efgh-Methylformiat-[...].400.dpt |

<sup>a</sup> A different filter F21 (4600-600  $\text{cm}^{-1}$ ) was used with the slightly different InSb2mmII detector and 2.5 mm aperture, <sup>b</sup> the shown spectrum was averaged over these two spectra, <sup>c</sup> 550 mbar reservoir pressure instead of 750 mbar, <sup>d</sup> 370 mbar reservoir pressure instead of 750 mbar, <sup>e</sup> a different FTIR setup was used with 0.04 % of E in helium, see Reference (18) for experimental details.

## S2.1 Details for the concentration calculations of the IR spectra

For convenience, the calculation for the concentrations (expressed as mole fractions  $x$ ) for a gas mixture is exemplified for Figure 2, trace c. The corresponding mixing conditions for this and the other spectra can be found in Tab. S12.

For methanol 40 mbar were filled into an empty gas bottle at room temperature, which was then filled up to 25 bar with helium. The fraction  $x(\text{M})$  is estimated via its vapor pressure  $p(\text{M})$  in relation to the total pressure  $p_{\text{total}}$  under the assumption of ideal behavior:

$$(S2) \quad x_{\text{gas bottle 1}}(\text{M}) \approx \frac{p(\text{M})}{p_{\text{total}}} = \frac{40 \cdot 10^{-3} \text{ bar}}{25 \text{ bar}} = 0.16 \%$$

For formic acid 20 mbar were used in a second empty gas bottle, which was then filled up to 50 bar with helium. Because formic acid has a pronounced tendency to form dimers at room temperature with a  $K_p$  around 300<sup>19,20</sup>, this has to be taken into account for a more accurate estimation of the concentration. The measured vapor pressure  $p_{\text{vapor}}$  of 20 mbar ( $= 20 \cdot 10^2 \text{ Pa}$ ) is the sum of the monomer  $p_{\text{monomer}}$  and dimer pressure  $p_{\text{dimer}}$  (Eq. S3). The partial pressure  $p_i$ , which will be used for the calculation of the formic acid fraction (similar to S2), is then the sum of the monomer  $p_{\text{monomer}}$  and two times the dimer pressure  $p_{\text{dimer}}$  (Eq. S4). This Equation S4 was obtained by solving the law of mass action, Equation S5, for  $p_{\text{monomer}}$  and using a standard pressure of  $p_0 = 10^5 \text{ Pa}$ .

$$(S3) \quad p_{\text{vapor}} = p_{\text{monomer}} + p_{\text{dimer}}$$

$$(S4) \quad p_i = \left( \underbrace{-\frac{p_0}{2K_p} + \sqrt{\left(\frac{p_0}{2K_p}\right)^2 + \frac{p_{\text{vapor}} p_0}{K_p}}}_{p_{\text{monomer}}} \right) + 2 \cdot \underbrace{(p_{\text{vapor}} - p_{\text{monomer}})}_{p_{\text{dimer}}}$$

$$= \left( \underbrace{-\frac{10^5 \text{ Pa}}{2 \cdot 300} + \sqrt{\left(\frac{10^5 \text{ Pa}}{2 \cdot 300}\right)^2 + \frac{20 \cdot 10^2 \text{ Pa} \cdot 10^5 \text{ Pa}}{300}}}_{p_{\text{monomer}}} \right) + 2 \cdot (20 \cdot 10^2 \text{ Pa} - p_{\text{monomer}})$$

$$= 3333.3 \text{ Pa} \approx 33.3 \text{ mbar}$$

$$(S5) \quad K_p = \frac{p_{\text{dimer}} \cdot p_0}{p_{\text{monomer}}^2}$$

$$(S6) \quad x_{\text{gas bottle 2}}(\text{F}) \approx \frac{p_i(\text{F})}{p_{\text{total}}} = \frac{33.3 \cdot 10^{-3} \text{ bar}}{50 \text{ bar}} = 0.067 \%$$

To finalise the actual mole fraction in the mixture for method O, it must be taken into account that both prepared gas mixtures were mixed 1:1 at the same pressure to create the actual measured mixture, which leads to a dilution by the factor of 2 for both the methanol and formic acid concentration:

$$(S7) \quad x(\text{M}) = x_{\text{gas bottle 1}}(\text{M})/2 \approx 0.08 \%$$

$$x(\text{F}) = x_{\text{gas bottle 2}}(\text{F})/2 \approx 0.03 \%$$

## References

1. S. Grimme, J. Antony, S. Ehrlich, H. Krieg, *J. Chem. Phys.* **132**, 154104 (2010).
2. S. Grimme, S. Ehrlich, L. Goerigk, *J. Comput. Chem.* **32**, 1456–1465 (2011).
3. F. Weigend, *Phys. Chem. Chem. Phys.* **4**, 4285–4291 (2002).
4. *TURBOMOLE V7.5 2020, a development of University of Karlsruhe and Forschungszentrum Karlsruhe GmbH, 1989-2007, TURBOMOLE GmbH, since 2007; available from <https://www.turbomole.org>.*
5. T. B. Adler, G. Knizia, H.-J. Werner, *J. Chem. Phys.* **127**, 221106 (2007).
6. W. Győrffy, G. Knizia, H.-J. Werner, *J. Chem. Phys.* **147**, 214101 (2017).
7. H.-J. Werner, P. J. Knowles, G. Knizia, F. R. Manby, M. Schütz, *WIREs Comput Mol Sci* **2**, 242–253 (2011).
8. H.-J. Werner *et al.*, *J. Chem. Phys.* **152**, 144107 (2020).
9. H.-J. Werner *et al.*, *MOLPRO, version 2022.1, a package of ab initio programs*, see <https://www.molpro.net>, Stuttgart, Germany.
10. R. A. Bachorz *et al.*, *J. Comput. Chem.* **32**, 2492–2513 (2011).
11. C. Hättig, D. P. Tew, A. Köhn, *J. Chem. Phys.* **132**, 231102 (2010).
12. O. Marchetti, H.-J. Werner, *Phys. Chem. Chem. Phys.* **10**, 3400 (2008).
13. S. Grimme, *J. Chem. Theory Comput.* **15**, 2847–2862 (2019).
14. S. Grimme, C. Bannwarth, P. Shushkov, *J. Chem. Theory Comput.* **13**, 1989–2009 (2017).
15. C. Bannwarth, S. Ehlert, S. Grimme, *J. Chem. Theory Comput.* **15**, 1652–1671 (2019).
16. P. Pracht, E. Caldeweyher, S. Ehlert, S. Grimme, *ChemRxiv* (2019, 10.26434/chemrxiv.8326202.v1).
17. *Origin(Pro) OriginLab Corporation, Northampton, MA, USA. Version 2022.*
18. H. C. Gottschalk *et al.*, *Instruments* **5**, 12 (Mar. 2021).
19. J. V. Auwera, K. Didriche, A. Perrin, F. Keller, *J. Chem. Phys.* **126**, 124311 (Mar. 2007).
20. K. Mackeprang, Z.-H. Xu, Z. Maroun, M. Meuwly, H. G. Kjaergaard, *Phys. Chem. Chem. Phys.* **18**, 24654–24662 (2016).
